# Supplementary material
Source: PubMed Central journal article supplement (PMC3838011)
Supplement: MCB.00876-13_zmb999100207so2.pdf [file MCB.00876-13_zmb999100207so2.pdf]

**Supplemental Table S1. Yeast strains used in this study.**

| Strain                                            | Genotype                                                                                                                 | Source                                        |
|---------------------------------------------------|--------------------------------------------------------------------------------------------------------------------------|-----------------------------------------------|
| <i>tim23</i> <sub>Δ1-50-316</sub>                 | <i>MATa ade2 his3 ura3 leu2 trp1 can1 tim23Δ::CgHIS3</i><br>[pRS316- <i>tim23</i> <sub>Δ1-50</sub> ]                     | <sup>1</sup> Yasushi<br>Tamura<br>et al. 2009 |
| <i>TIM23</i>                                      | <i>MATa ade2 his3 ura3 leu2 trp1 can1 tim23Δ::CgHIS3</i><br>[pRS314-Tim23]                                               | This study                                    |
| <i>tim23</i> <sub>Y105N/G120D</sub>               | <i>MATa ade2 his3 ura3 leu2 trp1 can1 tim23Δ::CgHIS3</i><br>[pRS314- <i>tim23</i> <sub>Y105N/G120D</sub> ]               | This study                                    |
| <i>tim23</i> <sub>L107R</sub>                     | <i>MATa ade2 his3 ura3 leu2 trp1 can1 tim23Δ::CgHIS3</i><br>[pRS314- <i>tim23</i> <sub>L107R</sub> ]                     | This study                                    |
| <i>tim23</i> <sub>L109P</sub>                     | <i>MATa ade2 his3 ura3 leu2 trp1 can1 tim23Δ::CgHIS3</i><br>[pRS314- <i>tim23</i> <sub>L109P</sub> ]                     | This study                                    |
| <i>tim23</i> <sub>I111N/M117K</sub>               | <i>MATa ade2 his3 ura3 leu2 trp1 can1 tim23Δ::CgHIS3</i><br>[pRS314- <i>tim23</i> <sub>I111N/M117K</sub> ]               | This study                                    |
| <i>tim23</i> <sub>L138P</sub>                     | <i>MATa ade2 his3 ura3 leu2 trp1 can1 tim23Δ::CgHIS3</i><br>[pRS314- <i>tim23</i> <sub>L138P</sub> ]                     | This study                                    |
| <i>tim23</i> <sub>N139E</sub>                     | <i>MATa ade2 his3 ura3 leu2 trp1 can1 tim23Δ::CgHIS3</i><br>[pRS314- <i>tim23</i> <sub>N139E</sub> ]                     | This study                                    |
| <i>tim23</i> <sub>G149E</sub>                     | <i>MATa ade2 his3 ura3 leu2 trp1 can1 tim23Δ::CgHIS3</i><br>[pRS314- <i>tim23</i> <sub>G149E</sub> ]                     | This study                                    |
| <i>tim23</i> <sub>G153V</sub>                     | <i>MATa ade2 his3 ura3 leu2 trp1 can1 tim23Δ::CgHIS3</i><br>[pRS314- <i>tim23</i> <sub>G153V</sub> ]                     | This study                                    |
| <i>tim23</i> <sub>D174A</sub>                     | <i>MATa ade2 his3 ura3 leu2 trp1 can1 tim23Δ::CgHIS3</i><br>[pRS314- <i>tim23</i> <sub>D174A</sub> ]                     | This study                                    |
| <i>tim23</i> <sub>R170</sub>                      | <i>MATa ade2 his3 ura3 leu2 trp1 can1 tim23Δ::CgHIS3</i><br>[pRS314- <i>tim23</i> <sub>R170</sub> ]                      | This study                                    |
| <i>tim23</i> <sub>K172</sub>                      | <i>MATa ade2 his3 ura3 leu2 trp1 can1 tim23Δ::CgHIS3</i><br>[pRS314- <i>tim23</i> <sub>K172</sub> ]                      | This study                                    |
| <i>tim23</i> <sub>L107R</sub> /pRS416 Tim17       | <i>MATa ade2 his3 ura3 leu2 trp1 can1 tim23Δ::CgHIS3</i><br>[pRS314- <i>tim23</i> <sub>L107R</sub> / pRS416-Tim17]       | This study                                    |
| <i>tim23</i> <sub>I111N/M117K</sub> /pRS416 Tim17 | <i>MATa ade2 his3 ura3 leu2 trp1 can1 tim23Δ::CgHIS3</i><br>[pRS314- <i>tim23</i> <sub>I111N/M117K</sub> / pRS416-Tim17] | This study                                    |
| <i>tim23</i> <sub>G149E</sub> /pRS416 Tim17       | <i>MATa ade2 his3 ura3 leu2 trp1 can1 tim23Δ::CgHIS3</i><br>[pRS314- <i>tim23</i> <sub>G149E</sub> / pRS416-Tim17]       | This study                                    |
| <i>TIM23</i> /pRS416 Tim21                        | <i>MATa ade2 his3 ura3 leu2 trp1 can1 tim23Δ::CgHIS3</i><br>[pRS314-Tim23/ pRS416-Tim21]                                 | This study                                    |
| <i>tim23</i> <sub>D174A</sub> /pRS416 Tim21       | <i>MATa ade2 his3 ura3 leu2 trp1 can1 tim23Δ::CgHIS3</i><br>[pRS314- <i>tim23</i> <sub>D174A</sub> / pRS416-Tim21]       | This study                                    |
| <i>tim23</i> <sub>R170</sub> /pRS416 Tim21        | <i>MATa ade2 his3 ura3 leu2 trp1 can1 tim23Δ::CgHIS3</i><br>[pRS314- <i>tim23</i> <sub>R170</sub> / pRS416-Tim21]        | This study                                    |
| <i>TIM23</i> -FLAG                                | <i>MATa ade2 his3 ura3 leu2 trp1 can1 tim23Δ::CgHIS3</i><br>[pRS316- <i>tim23</i> <sub>Δ1-50</sub> pRS314- Tim23 -FLAG]  | This study                                    |

|                                                              |                                                                                                                                                              |            |
|--------------------------------------------------------------|--------------------------------------------------------------------------------------------------------------------------------------------------------------|------------|
| <i>tim23</i> <sub>Y105N/G120D</sub> -FLAG                    | <i>MATa ade2 his3 ura3 leu2 trp1 can1 tim23Δ::CgHIS3</i><br>[pRS316- <i>tim23</i> <sub>Δ1-50</sub> ] pRS414- <i>tim23</i> <sub>Y105N/G120D</sub> -FLAG       | This study |
| <i>tim23</i> <sub>L107R</sub> -FLAG                          | <i>MATa ade2 his3 ura3 leu2 trp1 can1 tim23Δ::CgHIS3</i><br>[pRS316- <i>tim23</i> <sub>Δ1-50</sub> ] pRS414- <i>tim23</i> <sub>L107R</sub> -FLAG             | This study |
| <i>tim23</i> <sub>L109P</sub> -FLAG                          | <i>MATa ade2 his3 ura3 leu2 trp1 can1 tim23Δ::CgHIS3</i><br>[pRS316- <i>tim23</i> <sub>Δ1-50</sub> ] pRS414- <i>tim23</i> <sub>L109P</sub> -FLAG             | This study |
| <i>tim23</i> <sub>I111N/M117K</sub> -FLAG                    | <i>MATa ade2 his3 ura3 leu2 trp1 can1 tim23Δ::CgHIS3</i><br>[pRS316- <i>tim23</i> <sub>Δ1-50</sub> ] pRS414- <i>tim23</i> <sub>I111N/M117K</sub> -FLAG       | This study |
| <i>tim23</i> <sub>G149E</sub> -FLAG                          | <i>MATa ade2 his3 ura3 leu2 trp1 can1 tim23Δ::CgHIS3</i><br>[pRS316- <i>tim23</i> <sub>Δ1-50</sub> ] pRS414- <i>tim23</i> <sub>G149E</sub> -FLAG             | This study |
| <i>tim23</i> <sub>G153V</sub> -FLAG                          | <i>MATa ade2 his3 ura3 leu2 trp1 can1 tim23Δ::CgHIS3</i><br>[pRS316- <i>tim23</i> <sub>Δ1-50</sub> ] pRS414- <i>tim23</i> <sub>G153V</sub> -FLAG             | This study |
| <i>tim23</i> <sub>Δ1-50</sub> -316/ <i>tim21Δ</i>            | <i>MATa ade2 his3 ura3 leu2 trp1 can1 tim23Δ::CgHIS3</i><br>[pRS316- <i>tim23</i> <sub>Δ1-50</sub> ] <i>tim21Δ::kanMX4</i>                                   | This study |
| <i>tim23</i> <sub>Δ1-50</sub> -316/ <i>pam17Δ</i>            | <i>MATa ade2 his3 ura3 leu2 trp1 can1 tim23Δ::CgHIS3</i><br>[pRS316- <i>tim23</i> <sub>Δ1-50</sub> ] <i>pam17Δ::LEU2</i>                                     | This study |
| <i>tim23</i> <sub>Δ1-50</sub> -316/ <i>tam41Δ</i>            | <i>MATa ade2 his3 ura3 leu2 trp1 can1 tim23Δ::CgHIS3</i><br>[pRS316- <i>tim23</i> <sub>Δ1-50</sub> ] <i>tam41Δ::kanMX4</i>                                   | This study |
| <i>tim23</i> <sub>Δ1-50</sub> -316/ <i>pam17Δ/GAL1-TAM41</i> | <i>MATa ade2 his3 ura3 leu2 trp1 can1 tim23Δ::CgHIS3</i><br>[pRS316- <i>tim23</i> <sub>Δ1-50</sub> ] <i>pam17Δ::LEU2</i><br><i>tam41Δ::TRP1/GAL1-TAM41</i>   | This study |
| <i>tim23</i> <sub>Δ1-50</sub> -316/ <i>tim21Δ/GAL1-TAM41</i> | <i>MATa ade2 his3 ura3 leu2 trp1 can1 tim23Δ::CgHIS3</i><br>[pRS316- <i>tim23</i> <sub>Δ1-50</sub> ] <i>tim21Δ::kanMX4</i><br><i>tam41Δ::TRP1/GAL1-TAM41</i> | This study |
| <i>tim23</i> <sub>Y105N</sub>                                | <i>MATa ade2 his3 ura3 leu2 trp1 can1 tim23Δ::CgHIS3</i><br>[pRS314- <i>tim23</i> <sub>Y105N</sub> ]                                                         | This study |
| <i>tim23</i> <sub>G120D</sub>                                | <i>MATa ade2 his3 ura3 leu2 trp1 can1 tim23Δ::CgHIS3</i><br>[pRS314- <i>tim23</i> <sub>G120D</sub> ]                                                         | This study |
| <i>tim23</i> <sub>I111N</sub>                                | <i>MATa ade2 his3 ura3 leu2 trp1 can1 tim23Δ::CgHIS3</i><br>[pRS314- <i>tim23</i> <sub>I111N</sub> ]                                                         | This study |
| <i>tim23</i> <sub>M117K</sub>                                | <i>MATa ade2 his3 ura3 leu2 trp1 can1 tim23Δ::CgHIS3</i><br>[pRS314- <i>tim23</i> <sub>M117K</sub> ]                                                         | This study |
| <i>tim23</i> <sub>L138P</sub> /pRS316 Tim17                  | <i>MATa ade2 his3 ura3 leu2 trp1 can1 tim23Δ::CgHIS3</i><br>[pRS314- <i>tim23</i> <sub>L138P</sub> / pRS316-Tim17]                                           | This study |
| <i>tim23</i> <sub>N139E</sub> /pRS316 Tim17                  | <i>MATa ade2 his3 ura3 leu2 trp1 can1 tim23Δ::CgHIS3</i><br>[pRS314- <i>tim23</i> <sub>N139E</sub> / pRS316-Tim17]                                           | This study |

<sup>1</sup>Yasushi Tamura , Yoshihiro Harada ,Takuya Shiota ,Koji Yamano ,Kazuaki Watanabe, Mihoko Yokota , Hayashi Yamamoto , Hiromi Sesaki , and Toshiya Endo. 2009. Tim23 – Tim50 pair coordinates functions of translocators and motor proteins in mitochondrial protein import. *J. Cell Biol.*184:129-141.

## Supplemental Table S2. Plasmids used in this study.

| Plasmid                                                                 | Expressed protein                                             | Vector    | Restriction Site | Source                                   |
|-------------------------------------------------------------------------|---------------------------------------------------------------|-----------|------------------|------------------------------------------|
| pRS316-tim23 <sub>Δ1-50</sub>                                           | Tim23 <sub>Δ(1-50)</sub>                                      | pRS316    | EcoRI/XhoI       | <sup>1</sup> Yasushi Tamura et al., 2009 |
| pRS314-Tim23                                                            | Tim23                                                         | pRS314    | Spe1/Xho1        | This study                               |
| pRS314-tim23 <sub>Y105N/G120D</sub>                                     | tim23 <sub>Y105N/G120D</sub>                                  | pRS314    | Spe1/Xho1        | This study                               |
| pRS314-tim23 <sub>L107R</sub>                                           | tim23 <sub>L107R</sub>                                        | pRS314    | Spe1/Xho1        | This study                               |
| pRS314-tim23 <sub>L109P</sub>                                           | tim23 <sub>L109P</sub>                                        | pRS314    | Spe1/Xho1        | This study                               |
| pRS314-tim23 <sub>I111N/M117K</sub>                                     | tim23 <sub>I111N/M117K</sub>                                  | pRS314    | Spe1/Xho1        | This study                               |
| pRS314-tim23 <sub>L138P</sub>                                           | tim23 <sub>L138P</sub>                                        | pRS314    | Spe1/Xho1        | This study                               |
| pRS314-tim23 <sub>N139E</sub>                                           | tim23 <sub>N139E</sub>                                        | pRS314    | Spe1/Xho1        | This study                               |
| pRS314-tim23 <sub>G149E</sub>                                           | tim23 <sub>G149E</sub>                                        | pRS314    | Spe1/Xho1        | This study                               |
| pRS314-tim23 <sub>G153V</sub>                                           | tim23 <sub>G153V</sub>                                        | pRS314    | Spe1/Xho1        | This study                               |
| pRS314-tim23 <sub>D174A</sub>                                           | tim23 <sub>D174A</sub>                                        | pRS314    | Spe1/Xho1        | This study                               |
| pRS314-tim23 <sub>R170</sub>                                            | tim23 <sub>R170</sub>                                         | pRS314    | Spe1/Xho1        | This study                               |
| pRS314-tim23 <sub>K172</sub>                                            | tim23 <sub>K172</sub>                                         | pRS314    | Spe1/Xho1        | This study                               |
| pRS416-Tim17                                                            | Tim17                                                         | pRS416    | Spe1/Xho1        | This study                               |
| pRS416-Tim21                                                            | Tim21                                                         | pRS416    | Spe1/Xho1        | This study                               |
| pRS314-Tim23 FLAG                                                       | TIM23-FLAG                                                    | pRS314    | Spe1/Xho1        | This study                               |
| pRS414-tim23 <sub>Y105N/G120D</sub> FLAG                                | tim23 <sub>Y105N/G120D</sub> -FLAG                            | pRS414    | Spe1/Xho1        | This study                               |
| pRS414-tim23 <sub>L107R</sub> FLAG                                      | tim23 <sub>L107R</sub> -FLAG                                  | pRS414    | Spe1/Xho1        | This study                               |
| pRS414-tim23 <sub>L109P</sub> FLAG                                      | tim23 <sub>L109P</sub> -FLAG                                  | pRS414    | Spe1/Xho1        | This study                               |
| pRS414-tim23 <sub>I111N/M117K</sub> FLAG                                | tim23 <sub>I111N/M117K</sub> -FLAG                            | pRS414    | Spe1/Xho1        | This study                               |
| pRS414-tim23 <sub>G149E</sub> FLAG                                      | tim23 <sub>G149E</sub> -FLAG                                  | pRS414    | Spe1/Xho1        | This study                               |
| pRS414-tim23 <sub>G153V</sub> FLAG                                      | tim23 <sub>G153V</sub> -FLAG                                  | pRS414    | Spe1/Xho1        | This study                               |
| pET 3a-Pam17His <sub>6</sub>                                            | Pam17 His <sub>6</sub>                                        | pET 3a    | Nde1/BamHI       | This study                               |
| pET 3a-Tim21His <sub>6</sub>                                            | Tim21 (103-239) His <sub>6</sub>                              | pET 3a    | Nde1/BamHI       | This study                               |
| pET 3a-Tim23His <sub>6</sub>                                            | Tim23 (1-100) His <sub>6</sub>                                | pET 3a    | Nde1/BamHI       | This study                               |
| pRSF-duet cytb <sub>2</sub> (167) <sub>Δ</sub> 19-DHFR His <sub>6</sub> | cytb <sub>2</sub> (167) <sub>Δ</sub> 19-DHFR His <sub>6</sub> | pRSF-duet | Nde1/Xho1        | This study                               |
| pRSF-duet cytb <sub>2</sub> (167)-DHFR His <sub>6</sub>                 | cytb <sub>2</sub> (167)-DHFR His <sub>6</sub>                 | pRSF-duet | Nde1/Xho1        | This study                               |
| pRSF-duet Tim23 His <sub>6</sub>                                        | Tim23-His <sub>6</sub>                                        | pRSF-duet | Nde1/Xho1        | This study                               |

|                                                         |                                               |           |           |            |
|---------------------------------------------------------|-----------------------------------------------|-----------|-----------|------------|
| pRSF-duet tim23 <sub>Y105N/G120D</sub> His <sub>6</sub> | tim23 <sub>Y105N/G120D</sub> His <sub>6</sub> | pRSF-duet | Nde1/Xho1 | This study |
| pRSF-duet tim23 <sub>L107R</sub> His <sub>6</sub>       | tim23 <sub>L107R</sub> His <sub>6</sub>       | pRSF-duet | Nde1/Xho1 | This study |
| pRSF-duet tim23 <sub>L109P</sub> His <sub>6</sub>       | tim23 <sub>L109P</sub> His <sub>6</sub>       | pRSF-duet | Nde1/Xho1 | This study |
| pRSF-duet tim23 <sub>I111N/M117K</sub> His <sub>6</sub> | tim23 <sub>I111N/M117K</sub> His <sub>6</sub> | pRSF-duet | Nde1/Xho1 | This study |
| pRSF-duet tim23 <sub>G149E</sub> His <sub>6</sub>       | tim23 <sub>G149E</sub> His <sub>6</sub>       | pRSF-duet | Nde1/Xho1 | This study |
| pRSF-duet tim23 <sub>G153V</sub> His <sub>6</sub>       | tim23 <sub>G153V</sub> His <sub>6</sub>       | pRSF-duet | Nde1/Xho1 | This study |
| pRS316-Tim17                                            | Tim17                                         | pRS316    | Spe1/Xho1 | This study |

---

<sup>1</sup>Yasushi Tamura ,Yoshihiro Harada ,Takuya Shiota ,Koji Yamano ,Kazuaki Watanabe, Mihoko Yokota , Hayashi Yamamoto , Hiromi Sesaki , and Toshiya Endo. 2009. Tim23 – Tim50 pair coordinates functions of translocators and motor proteins in mitochondrial protein import. *J. Cell Biol.*184:129-141.
